# Supplementary material for: Effective Cellular Transport of Ortho-Halogenated Sulfonamide Derivatives of Metformin Is Related to Improved Antiproliferative Activity and Apoptosis Induction in MCF-7 Cells
Source: PubMed Central journal article supplement (PMC7177633; doi:10.3390/ijms21072389), 2020-03-30
Supplement: ijms-21-02389-s001.pdf [file ijms-21-02389-s001.pdf]

**Table S1.** Km and vmax values for the uptake of sulfonamide derivatives 1–9 in MCF-7 and MDA-MB-231 cells (Michaelis Menten curves).

| Kinetic parameters of sulfonamide uptake |                              |                                |                          |                               |                                |                          |
|------------------------------------------|------------------------------|--------------------------------|--------------------------|-------------------------------|--------------------------------|--------------------------|
| COMPOUND                                 | MCF-7                        |                                |                          | MDA-231 cells                 |                                |                          |
|                                          | Km [ $\mu\text{mol/L}$ ]     | Vmax<br>[nmol/min/mg]          | Vmax/Km<br>[mL/(nim*mg)] | Km [ $\mu\text{mol/L}$ ]      | Vmax<br>[nmol/min/mg]          | Vmax/Km<br>[mL/(nim*mg)] |
| <b>Metformin</b>                         | 5583 $\pm$ 1560 <sup>#</sup> | 0.801 $\pm$ 0.296 <sup>#</sup> | 0.00014 <sup>#</sup>     | 3375.0 $\pm$ 952 <sup>#</sup> | 0.718 $\pm$ 0.181 <sup>#</sup> | 0.000212 <sup>#</sup>    |
| <b>1</b>                                 | NE                           | NE                             | NE                       | 8300 $\pm$ 3266               | 0.047 $\pm$ 0.065              | 0.000006                 |
| <b>2</b>                                 | 9051 $\pm$ 1521              | 34.4 $\pm$ 17.2                | 0.0038                   | 6752 $\pm$ 1731               | 0.157 $\pm$ 0.129              | 0.000023                 |
| <b>3</b>                                 | 3584 $\pm$ 1711              | 5.073 $\pm$ 1.96               | 0.00141                  | NE                            | NE                             | NE                       |
| <b>4</b>                                 | 2471 $\pm$ 652               | 0.049 $\pm$ 0.02               | 0.00002                  | NE                            | NE                             | NE                       |
| <b>5</b>                                 | 4938 $\pm$ 1342              | 1.87 $\pm$ 0.95                | 0.00038                  | NE                            | NE                             | NE                       |
| <b>6</b>                                 | NE                           | NE                             | NE                       | 3753.0 $\pm$ 1604             | 4.044 $\pm$ 1.302              | 0.00107                  |
| <b>7</b>                                 | 10768 $\pm$ 5128             | 23.92 $\pm$ 7.20               | 0.0022                   | NE                            | NE                             | NE                       |
| <b>8</b>                                 | NE                           | NE                             | NE                       | 7402 $\pm$ 510                | 0.126 $\pm$ 0.032              | 0.000017                 |
| <b>9</b>                                 | NE                           | NE                             | NE                       | NE                            | NE                             | NE                       |

NE – not estimated (linear dependency up to the maximal tested concentrations); <sup>#</sup> kinetic parameters of metformin uptake in MCF-7 cells and MDA-MB-231 cells were reported previously (Markowicz-Piasecka et al., 2019).

**Table 2.** The summary of interactions of metformin derivatives 1–9 with OCT, PMAT and MATE1 transporters in MCF-7 and MDA-MB-231 cells.

| COMPOUND | MCF-7                   | MDA-MB-231        |
|----------|-------------------------|-------------------|
| <b>1</b> | OCT1, OCT3, PMAT, MATE1 | OCT1, PMAT        |
| <b>2</b> | OCT1, OCT3, PMAT        | OCT1, OCT3        |
| <b>3</b> | OCT1, MATE1             | OCT1, PMAT, MATE1 |
| <b>4</b> | OCT1, PMAT              | OCT1, OCT3, PMAT  |
| <b>5</b> | OCT1, MATE1, PMAT       | OCT1, OCT3        |
| <b>6</b> | OCT1, PMAT, MATE1       | OCT1, OCT3, MATE1 |
| <b>7</b> | OCT3, PMAT              | OCT1, OCT3        |
| <b>8</b> | OCT1                    | OCT1, OCT3        |
| <b>9</b> | PMAT                    | OCT1, OCT3        |

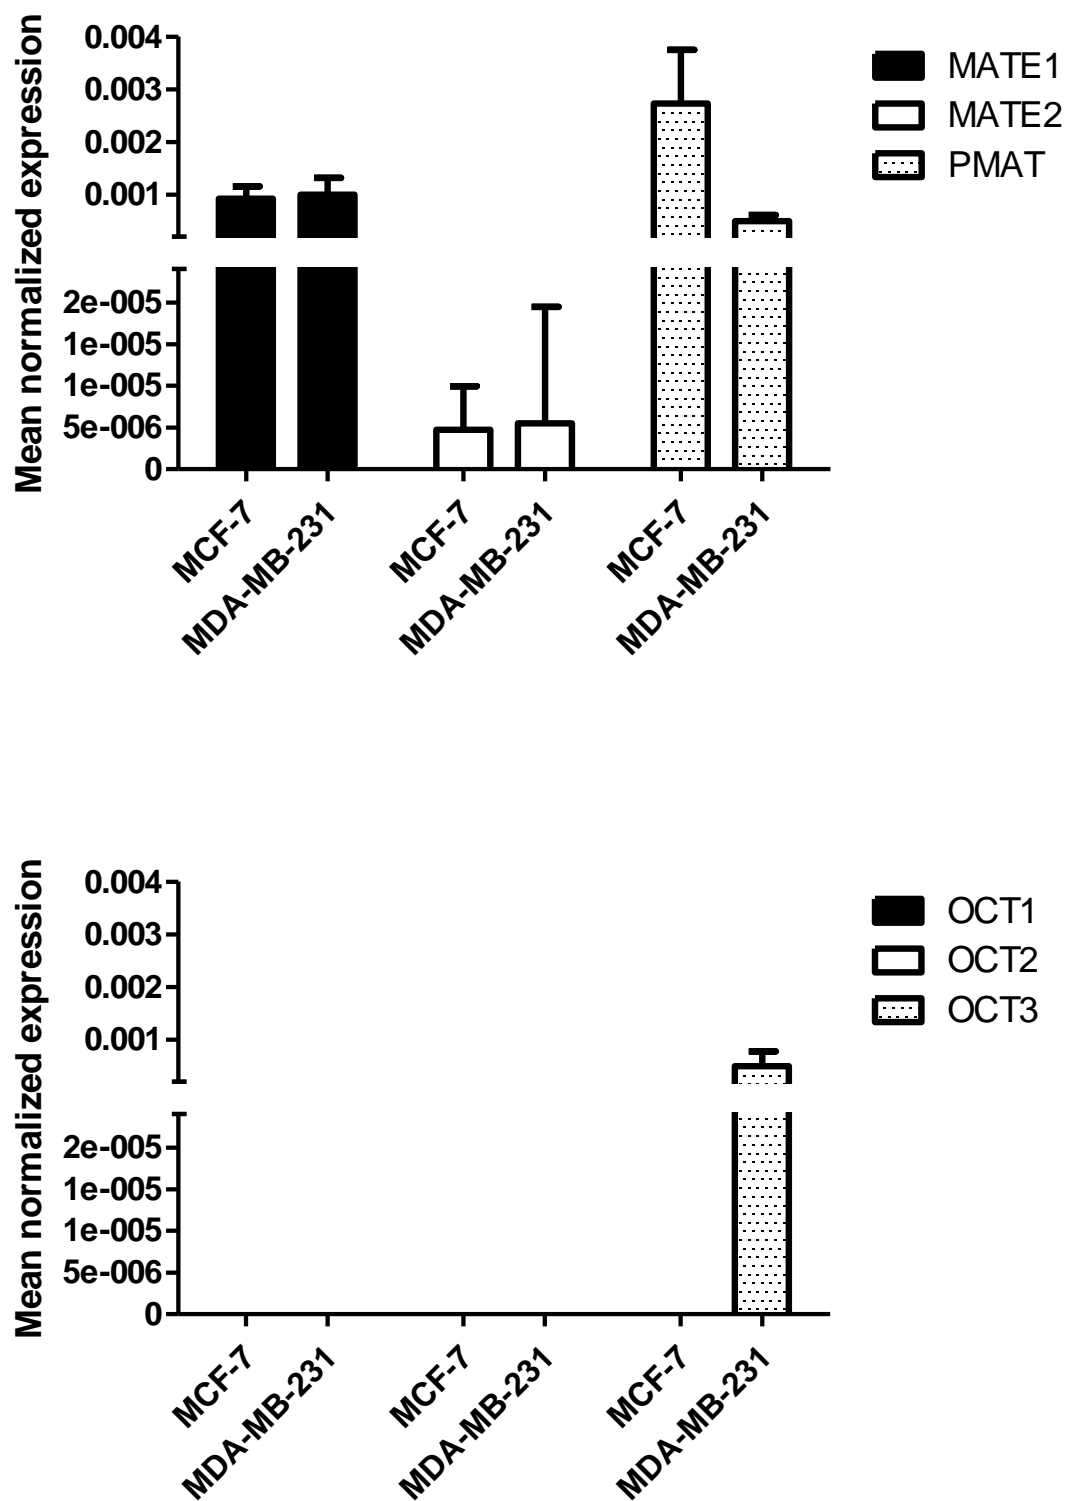

**Figure S1.** The expression of transporters in MCF-7 and MDA-MB-231 cells: A) MATE 1 – 2, and PMAT transporters; B) OCT 1 – 3. The results of OCT1–3 expression were published previously (Markowicz-Piasecka et al., 2019).

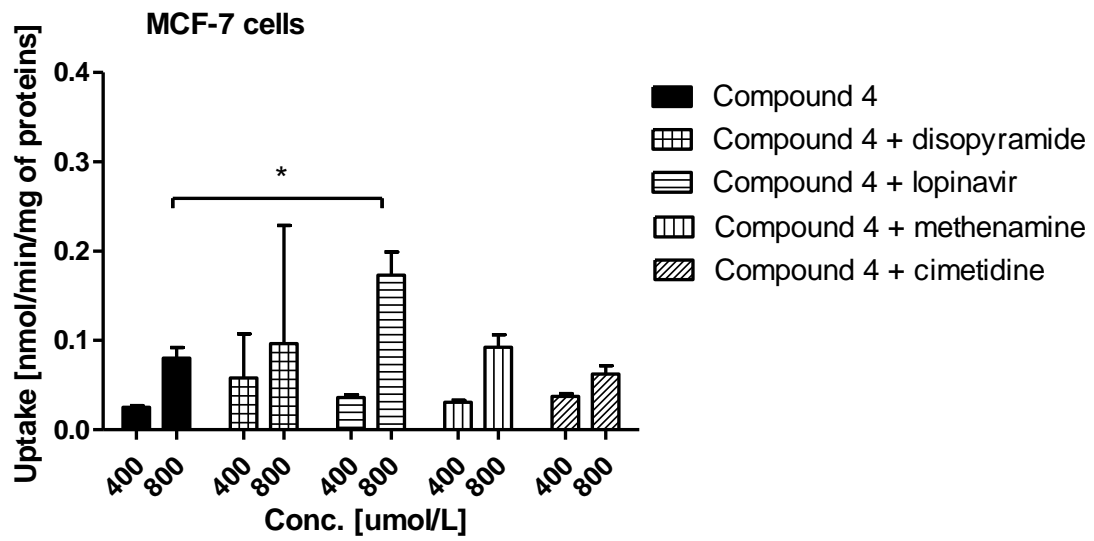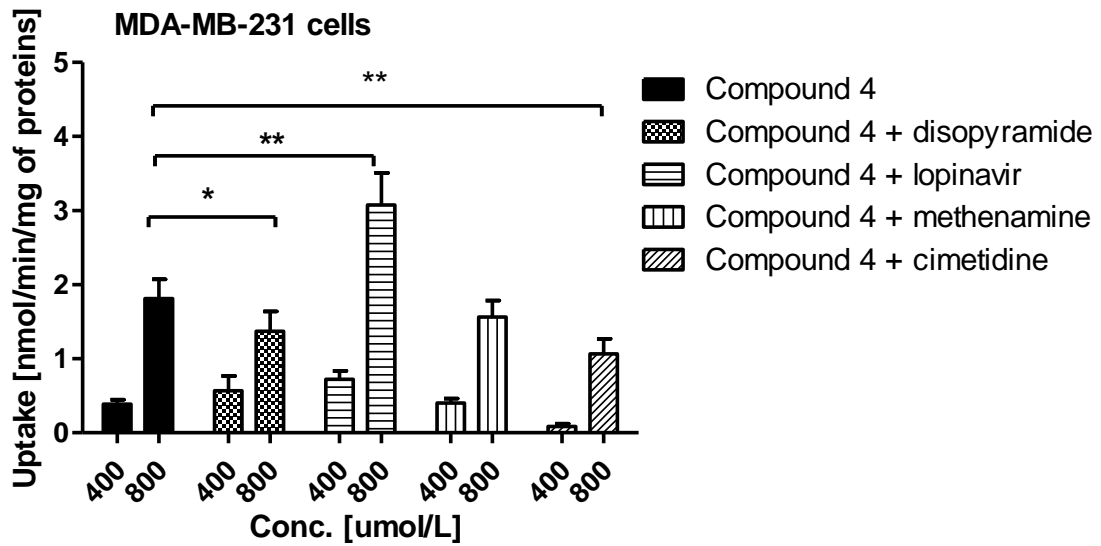

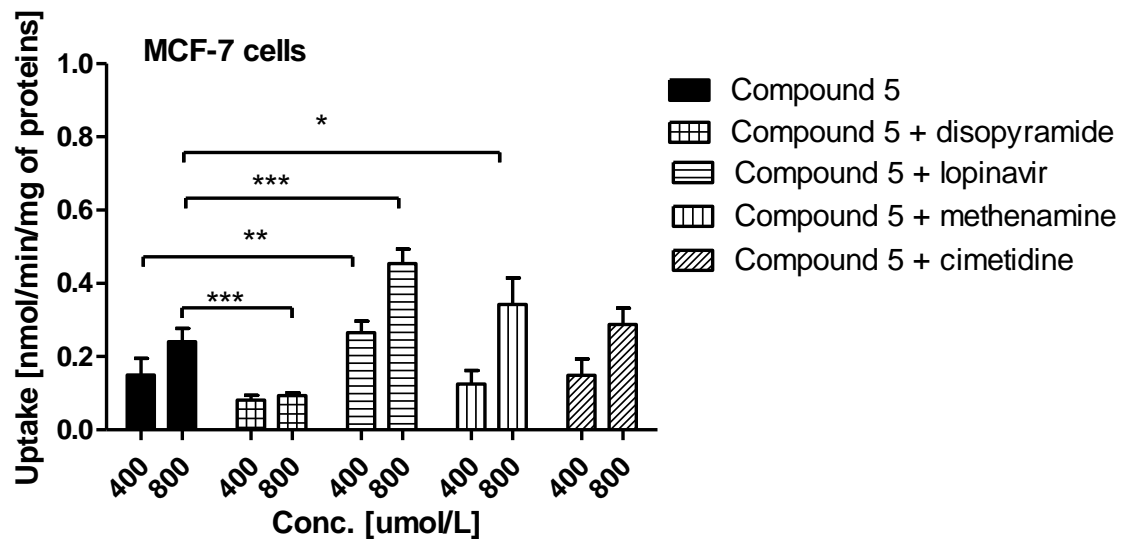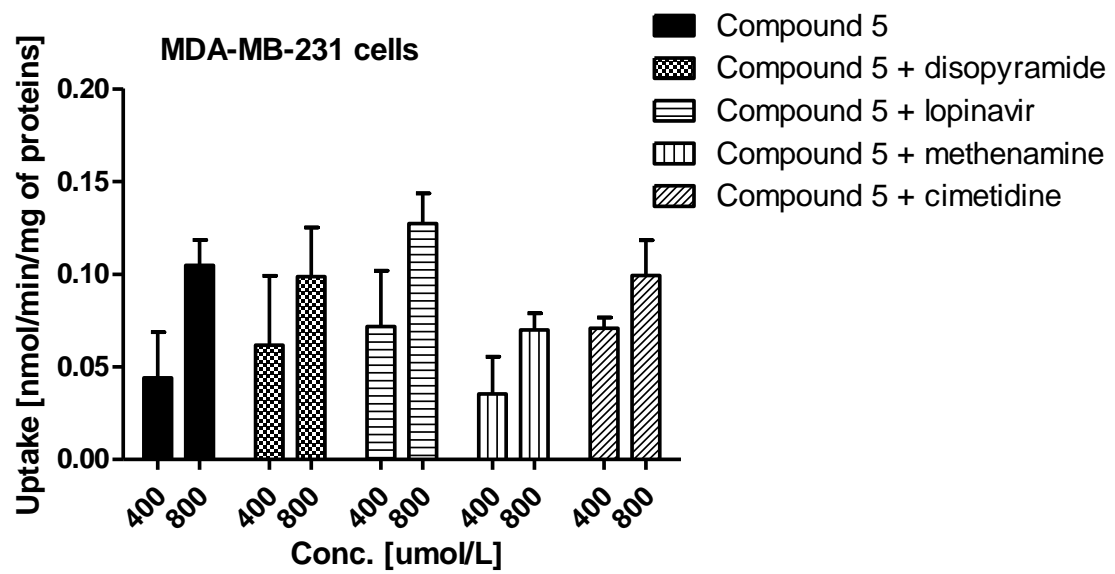

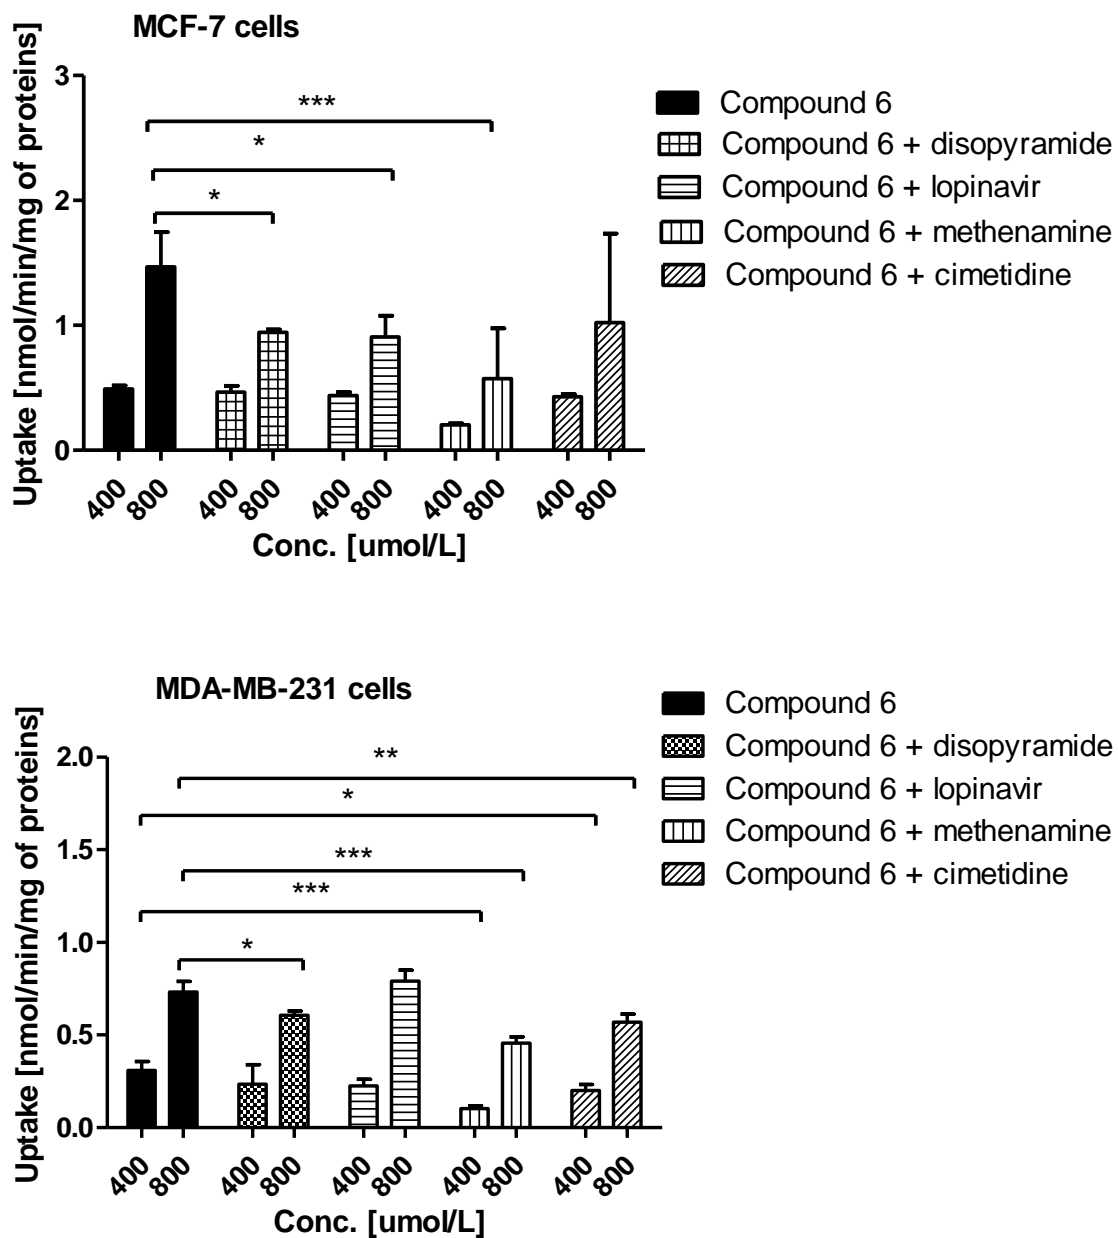

**Figure S2.** The uptake mechanism of compounds 4–6 (400 and 800  $\mu\text{mol/L}$ ) into MCF-7 cells and MDA-MB-231 cells. The uptake was determined in the presence of OCT and MATE inhibitors, disopyramide, lopinavir, methenamine, cimetidine (400 and 800  $\mu\text{mol/L}$ ) for 10 minutes at 37  $^{\circ}\text{C}$ . One-way Anova analysis was performed to compare the uptake of pure compounds (4–6 at 400 and 800  $\mu\text{mol/L}$ ) with their uptake in the presence of transporters inhibitors. The significant differences between the uptake of pure compounds 4–6 (black bars) and their respective mixtures with inhibitors (disopyramide, lopinavir, methenamine or cimetidine) are marked with black lines and are denoted with asterisk. \*  $p < 0.05$ , \*\*  $p < 0.01$ , \*\*\*  $p < 0.001$ .

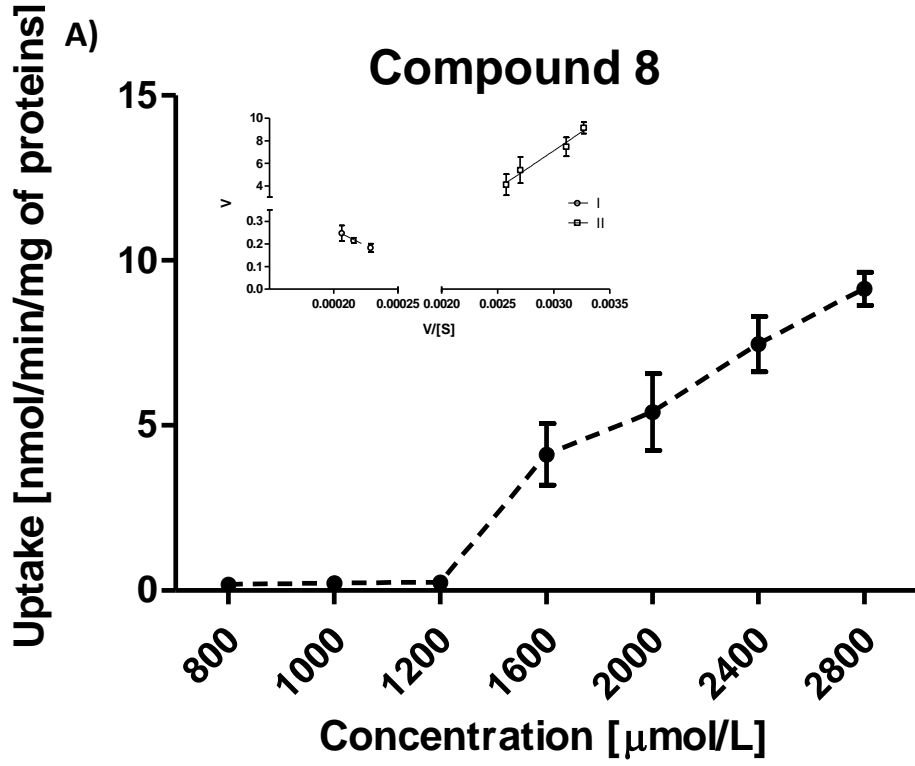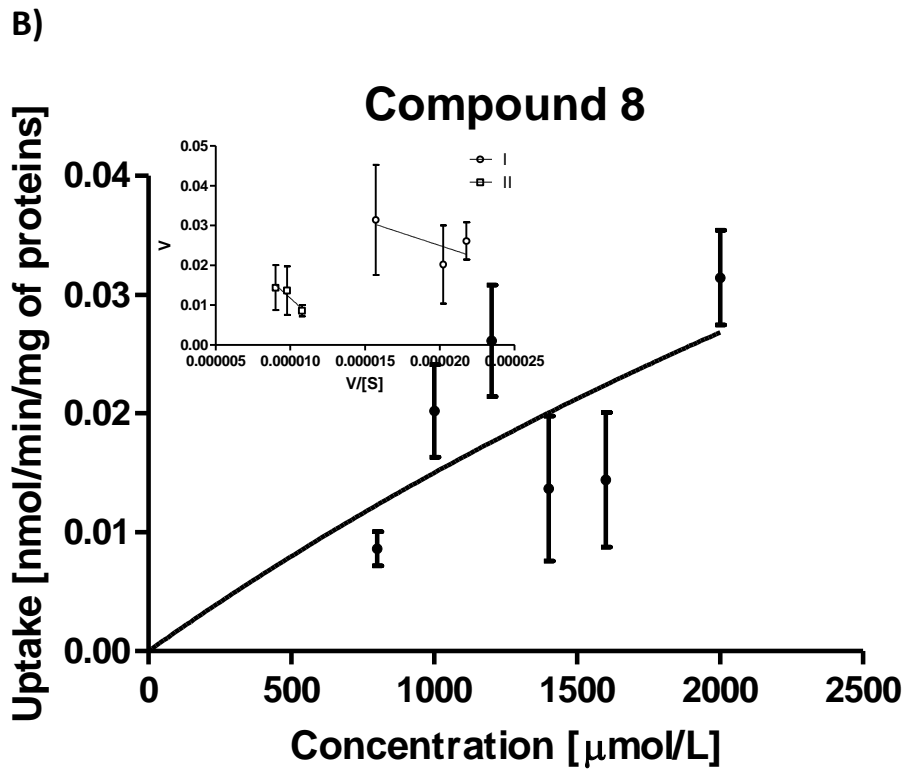

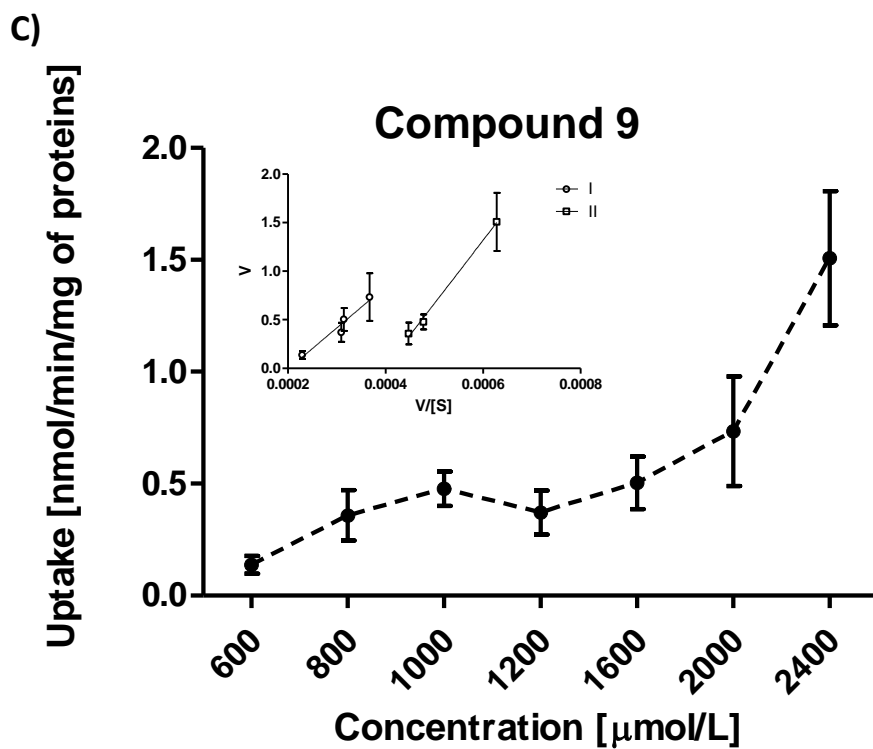

**Figure S3.** The uptake of selected sulfonamides into MCF-7 or MDA-MB-231 cells.

- The uptake of compound 8 into MCF-7 cells and Eadie-Hofstee plots for OCTs mediated transport.
- The uptake of compound 8 into MDA-MB-231 cells and Eadie-Hofstee plots for OCTs mediated transport.
- The uptake of compound 9 into MCF-7 cells and Eadie-Hofstee plots.

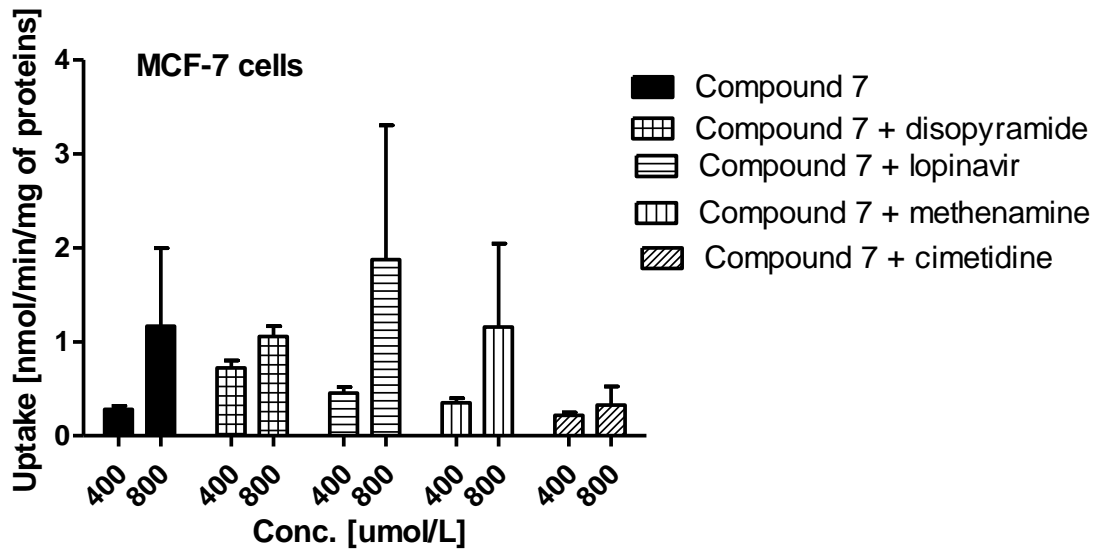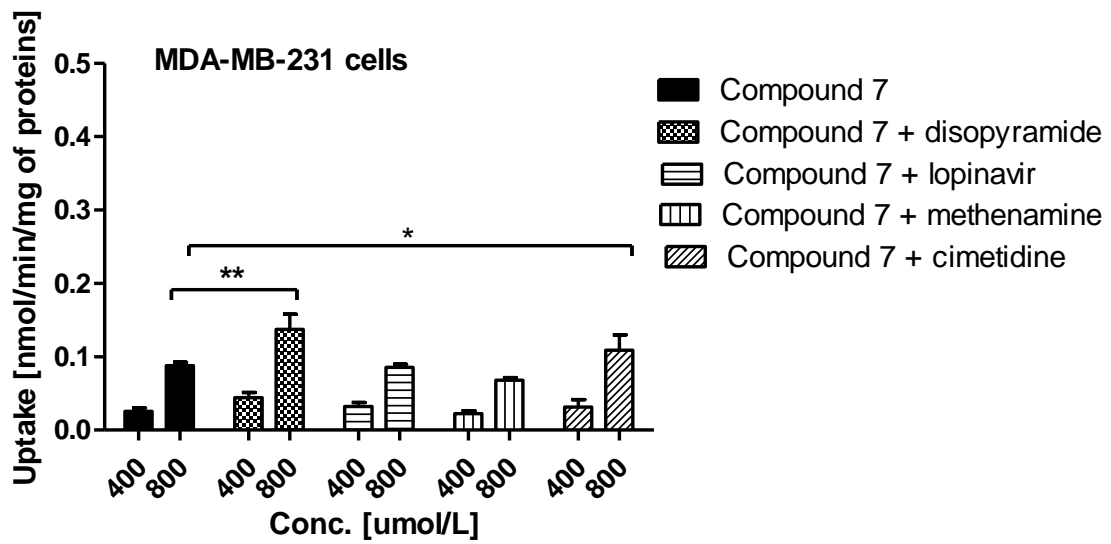



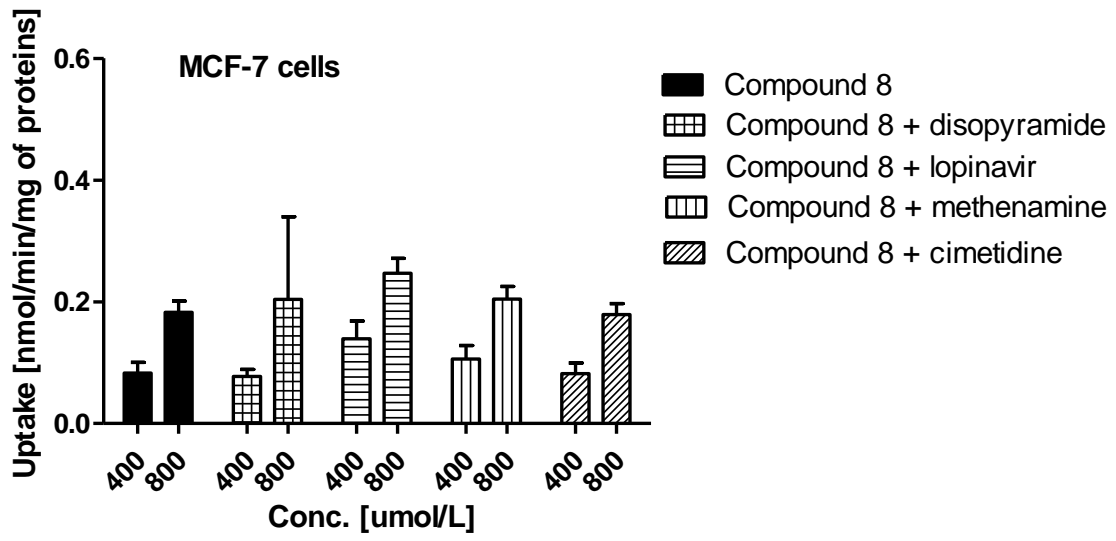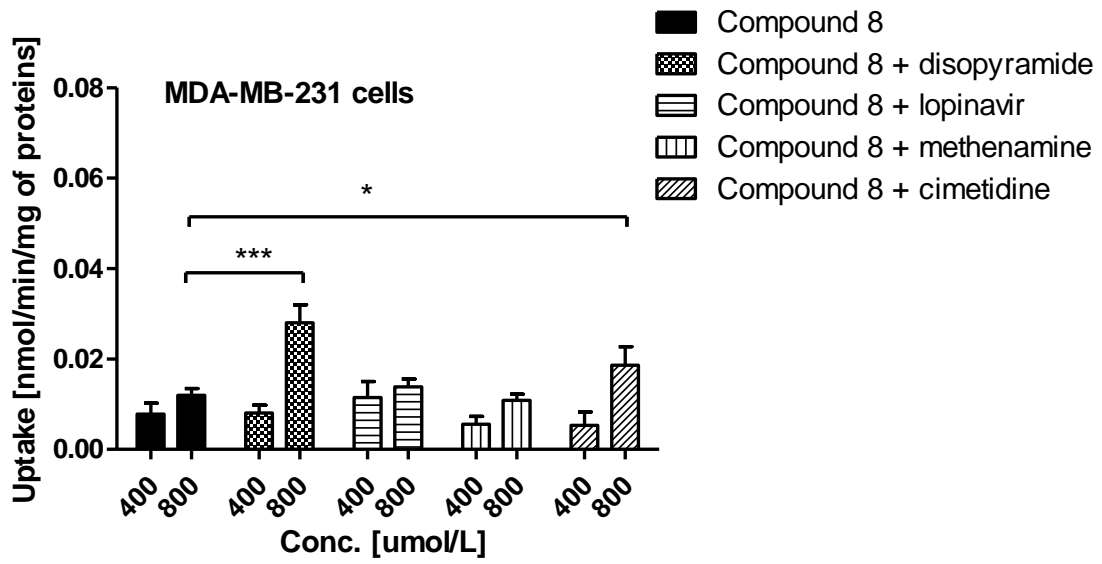

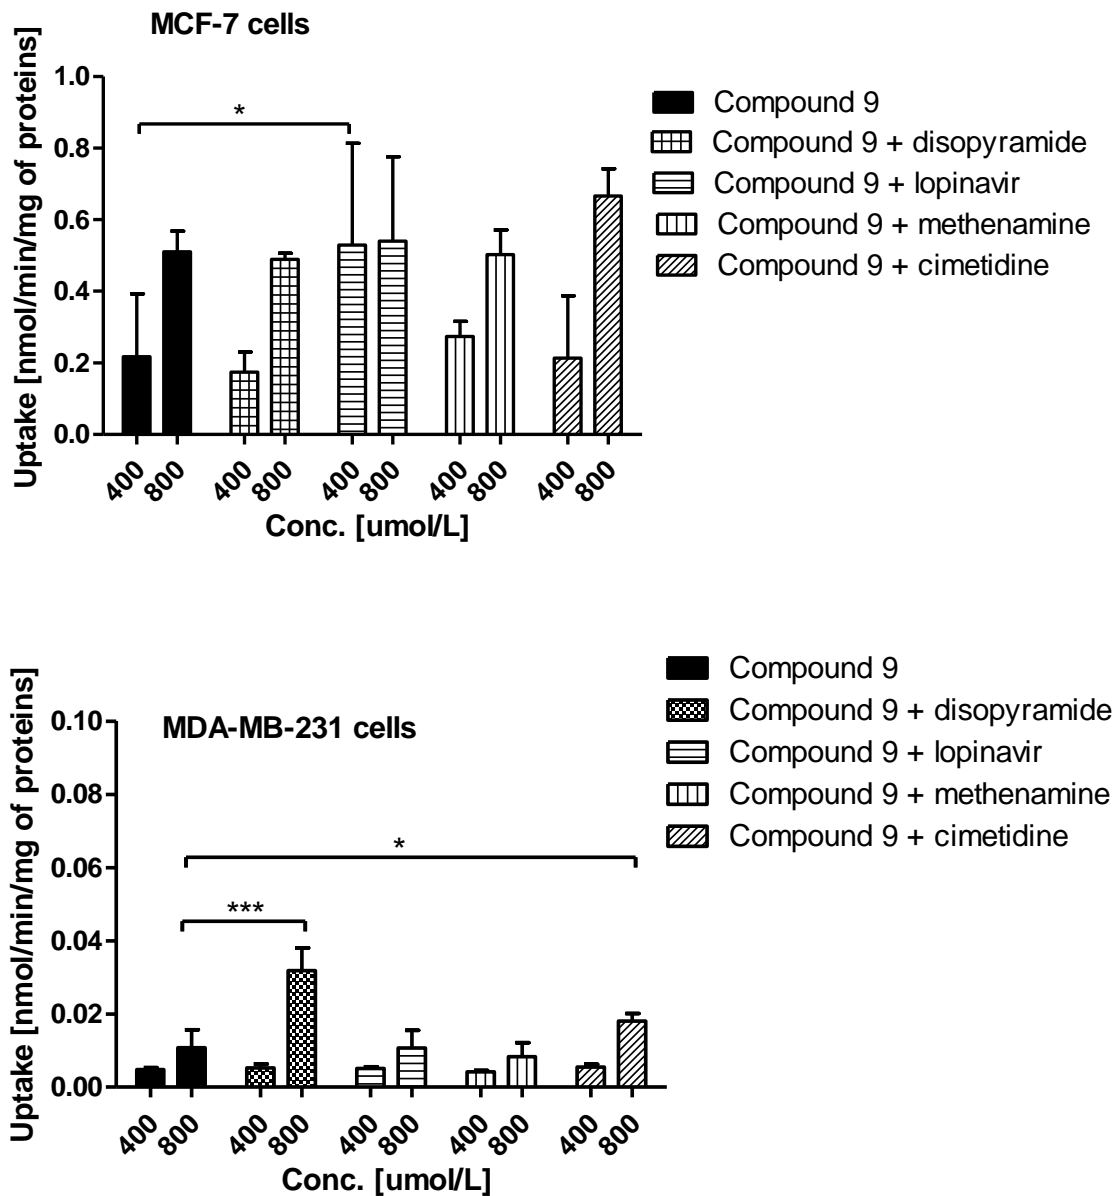

**Figure S4.** The uptake mechanism of compounds 7 - 9 (400 and 800  $\mu\text{mol/L}$ ) into MCF-7 cells and MDA-MB-231 cells. The uptake was determined in the presence of OCT and MATE inhibitors, disopyramide, lopinavir, methenamine, cimetidine (400 and 800  $\mu\text{mol/L}$ ) for 10 minutes at 37  $^{\circ}\text{C}$ . One-way Anova analysis was performed to compare the uptake of pure compounds (7-9 at 400 and 800  $\mu\text{mol/L}$ ) with their uptake in the presence of transporters inhibitors. The significant differences between the uptake of pure compounds 7-9 (black bars) and their respective mixtures with inhibitors (disopyramide, lopinavir, methenamine or cimetidine) are marked with black lines and are denoted with asterisk. \*  $p < 0.05$ , \*\*  $p < 0.01$ , \*\*\*  $p < 0.001$ .
